# Supplementary material for: Perturbing the O–H…O Hydrogen Bond in 1-oxo-3-hydroxy-2-propene
Source: MDPI journal article supplement (doi:10.3390/molecules26113086), 2021-05-21
Supplement: s1 [file s1]

## Supporting Information for

### **Perturbing the O-H $\cdots$ O hydrogen bond in 1-oxo-3-hydroxy-2-propene**

Ibon Alkorta,<sup>\*[a]</sup> José Elguero,<sup>[a]</sup> and Janet E. Del Bene,<sup>\*[b]</sup>

[a] *Instituto de Química Médica (IQM-CSIC), Juan de la Cierva, 3, E-28006 Madrid, Spain*

[b] *Department of Chemistry, Youngstown State University, Youngstown, Ohio 44555, USA*

Pgs. S2 – S6: Table S1. Structures (Å), total energies (au), and molecular graphs of  
1-oxo-3-hydroxy-2-propene:Acid complexes

Pg. S7 Fig. S1. Relationship between electron densities at the O-H hydrogen bonds and  
interatomic distances.

Pg. S8 – S10: Table S2. Components of spin-spin coupling constants  $^2J(\text{O-O})$ ,  $^1J(\text{H-O})$ , and  
 $^1J(\text{O-H})$  (Hz)

Table S1. Structures (Å), total energies (au), and molecular graphs of 1-oxo-3-hydroxy-2-propene:Acid complexes

|                                                                                     |                                                                                                                                                                                                                                                                                                                                                                                                                                                                                     |
|-------------------------------------------------------------------------------------|-------------------------------------------------------------------------------------------------------------------------------------------------------------------------------------------------------------------------------------------------------------------------------------------------------------------------------------------------------------------------------------------------------------------------------------------------------------------------------------|
| 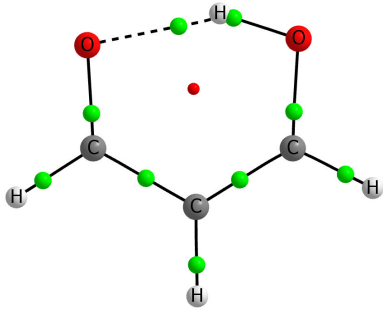   | <p><b>1</b><br/> MP2= -266.70194280 NIMAG= 0<br/> C,-0.0985920137,0.,0.0464953349<br/> O,-0.0387775045,0.,1.2894512904<br/> H,0.836805299,0.,-0.5285506099<br/> C,-1.3355459477,0.,-0.6807835651<br/> H,-1.3401544589,0.,-1.7589277237<br/> C,-2.5131732456,0.,0.0049034509<br/> H,-3.4766886818,0.,-0.4906817834<br/> O,-2.5964771066,0.,1.3233776836<br/> H,-1.6483545336,0.,1.6447159223</p>                                                                                     |
|   | <p><b>1(ts)</b><br/> MP2= -266.69753851 NIMAG= 1<br/> C,1.1854240801,0.,-0.3727246333<br/> O,1.1825128883,0.,0.9081519642<br/> H,2.1590853689,0.,-0.8618542603<br/> C,0.,0.,-1.1089202091<br/> H,0.,0.,-2.1855588128<br/> C,-1.1854240801,0.,-0.3727246333<br/> H,-2.1590853689,0.,-0.8618542603<br/> O,-1.1825128883,0.,0.9081519642<br/> H,0.,0.,1.1401074708</p>                                                                                                                 |
|  | <p><b>1:LiH(OH)</b><br/> MP2= -274.74064245 NIMAG= 0<br/> C,-0.1625693391,0.,-0.0365729891<br/> O,0.0603365221,0.,1.1897078029<br/> H,0.6894810041,0.,-0.7256180356<br/> C,-1.4895771608,0.,-0.5867000297<br/> H,-1.6449084565,0.,-1.6531536029<br/> C,-2.5577080754,0.,0.2508799595<br/> H,-3.5991239563,0.,-0.0510538323<br/> O,-2.4002201358,0.,1.5851991902<br/> H,-1.3934330233,0.,1.7295174921<br/> Li,-4.1218204159,0.,2.5180736493<br/> H,-5.4553335727,0.,1.5711424971</p> |

|                                                                                     |                                                                                                                                                                                                                                                                                                                                                                                                                                                                                   |
|-------------------------------------------------------------------------------------|-----------------------------------------------------------------------------------------------------------------------------------------------------------------------------------------------------------------------------------------------------------------------------------------------------------------------------------------------------------------------------------------------------------------------------------------------------------------------------------|
| 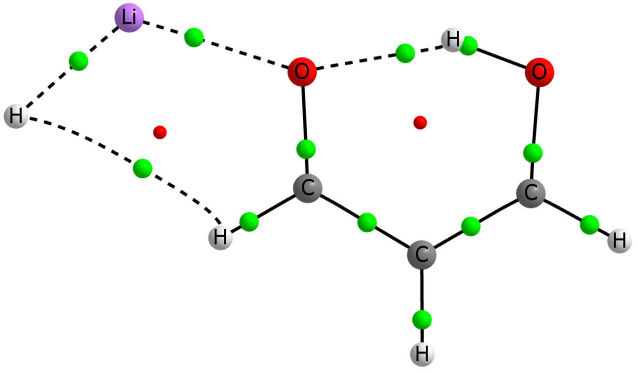   | <p><b>1:LiH(CO)</b><br/> MP2= -274.74482785 NIMAG= 0<br/> C,-2.4687496639,0.,-0.0769525076<br/> O,-2.7758111196,0.,1.2036433539<br/> H,-3.3345132803,0.,-0.7279551233<br/> C,-1.1907052801,0.,-0.5601314554<br/> H,-1.0213938657,0.,-1.6242316934<br/> C,-0.0867566574,0.,0.335157743<br/> H,0.9351987577,0.,-0.055904677<br/> O,-0.2332587632,0.,1.5888012568<br/> H,-1.907140805,0.,1.6886934289<br/> Li,1.5251202794,0.,2.4441707718<br/> H,2.9125538613,0.,1.5706287515</p>   |
|   | <p><b>1:LiH(ts)</b><br/> MP2= -274.73873745 NIMAG= 1<br/> C,1.1942333168,0.,-0.3666021708<br/> O,1.1946046057,0.,0.9051655943<br/> H,2.1642978563,0.,-0.8636968214<br/> C,-0.002479598,0.,-1.1066491276<br/> H,-0.0004511476,0.,-2.183177878<br/> C,-1.1830736394,0.,-0.3946669917<br/> H,-2.1733544434,0.,-0.8444681028<br/> O,-1.165329557,0.,0.9162931086<br/> H,-0.0168727554,0.,1.14501648<br/> Li,-2.9864156072,0.,1.6254573952<br/> H,-4.2296604755,0.,0.5580904478</p>    |
|  | <p><b>1:LiF(OH)</b><br/> MP2= -373.99985235 NIMAG= 0<br/> C,-0.1868943779,0.,-0.0443748221<br/> O,0.0735448291,0.,1.1752030266<br/> H,0.6450667905,0.,-0.7580829713<br/> C,-1.5271970425,0.,-0.5570094623<br/> H,-1.7096038424,0.,-1.6192282101<br/> C,-2.5761047335,0.,0.3058879433<br/> H,-3.6311973507,0.,0.0463485098<br/> O,-2.3791346535,0.,1.6369974003<br/> H,-1.3711972258,0.,1.755829412<br/> Li,-4.1386920595,0.,2.5125169386<br/> F,-5.2734669435,0.,1.3373343365</p> |

|                                                                                     |                                                                                                                                                                                                                                                                                                                                                                                                                                                                                                                                     |
|-------------------------------------------------------------------------------------|-------------------------------------------------------------------------------------------------------------------------------------------------------------------------------------------------------------------------------------------------------------------------------------------------------------------------------------------------------------------------------------------------------------------------------------------------------------------------------------------------------------------------------------|
| 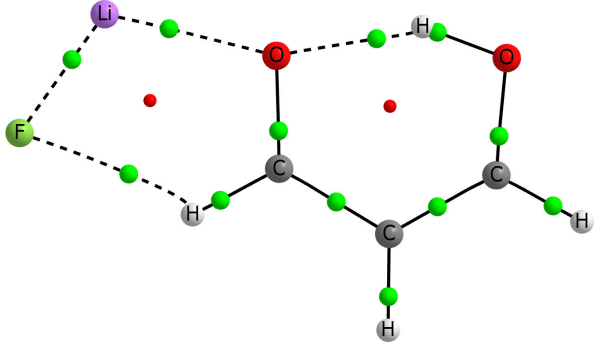   | <p><b>1:LiF(CO)</b><br/> MP2= -374.00336718 NIMAG= 0<br/> C,-2.4379447193,0.,-0.086421344<br/> O,-2.7860854215,0.,1.1849898015<br/> H,-3.2823567667,0.,-0.7650682102<br/> C,-1.145141116,0.,-0.5262131884<br/> H,-0.9406618196,0.,-1.5841905405<br/> C,-0.0692081605,0.,0.4052123676<br/> H,0.9724835329,0.,0.065899115<br/> O,-0.2657602799,0.,1.654359579<br/> H,-1.9294231164,0.,1.6940141589<br/> Li,1.5343674033,0.,2.4438535605<br/> F,2.7042739268,0.,1.2994845497</p>                                                       |
|   | <p><b>1:LiF(ts)</b><br/> MP2= -373.99770572 NIMAG= 1<br/> C,1.1691722505,0.,-0.3807726581<br/> O,1.2111784187,0.,0.8924608257<br/> H,2.1235751959,0.,-0.9073479227<br/> C,-0.0479021539,0.,-1.0815615111<br/> H,-0.0781994611,0.,-2.1576965625<br/> C,-1.2096366516,0.,-0.3348113787<br/> H,-2.221386231,0.,-0.7399798962<br/> O,-1.1462181279,0.,0.9753300966<br/> H,0.0136257026,0.,1.1678853427<br/> Li,-3.0003431412,0.,1.6192118686<br/> F,-4.0183672456,0.,0.3380437295</p>                                                   |
|  | <p><b>1:BeH<sub>2</sub>(OH)</b><br/> MP2= -282.56000229 NIMAG= 0<br/> C,-0.2368352925,0.,0.0823796046<br/> O,-0.1306596403,0.,1.3205502055<br/> H,0.6736816788,0.,-0.5262822212<br/> C,-1.5152264324,0.,-0.5888868476<br/> H,-1.5744655131,0.,-1.6651563818<br/> C,-2.6493249233,0.,0.1466683717<br/> H,-3.6598308445,0.,-0.2376810847<br/> O,-2.5979753075,0.,1.494093531<br/> H,-1.6084479128,0.,1.7531549136<br/> Be,-3.9523946612,0.,2.5277783459<br/> H,-5.0481486291,0.,1.7181318166<br/> H,-3.5382421421,0.,3.8154830065</p> |

|                                                                                     |                                                                                                                                                                                                                                                                                                                                                                                                                                                                                                                                  |
|-------------------------------------------------------------------------------------|----------------------------------------------------------------------------------------------------------------------------------------------------------------------------------------------------------------------------------------------------------------------------------------------------------------------------------------------------------------------------------------------------------------------------------------------------------------------------------------------------------------------------------|
| 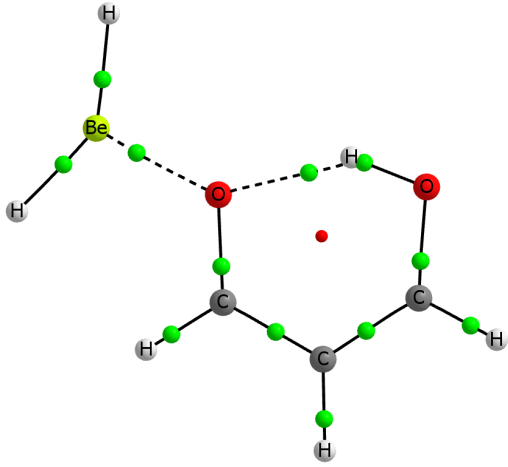   | <p><b>1:BeH<sub>2</sub>(CO)</b><br/> MP2= -282.56577741 NIMAG= 0<br/> C,-2.3862360611,0.,0.0253836566<br/> O,-2.6079514417,0.,1.3152815268<br/> H,-3.294595433,0.,-0.5652880518<br/> C,-1.1437939643,0.,-0.5583038271<br/> H,-1.0616581413,0.,-1.6325364343<br/> C,0.0173824554,0.,0.2398408147<br/> H,1.0125491335,0.,-0.2075297547<br/> O,-0.0489762854,0.,1.5060851274<br/> H,-1.7201452793,0.,1.7630386993<br/> Be,1.3725906976,0.,2.448169067<br/> H,2.4362859663,0.,1.5847137772<br/> H,1.0864536634,0.,3.7737768489</p>   |
|   | <p><b>1:BeH<sub>2</sub>(ts)</b><br/> MP2= -282.55876893 NIMAG= 1<br/> C,-0.2688561338,0.,0.0753740415<br/> O,-0.1990294664,0.,1.3362231034<br/> H,0.6699451274,0.,-0.479102932<br/> C,-1.513032767,0.,-0.6075646092<br/> H,-1.5631449233,0.,-1.6830154845<br/> C,-2.6485886249,0.,0.1544205962<br/> H,-3.662372181,0.,-0.2292612647<br/> O,-2.5507902196,0.,1.4723844292<br/> H,-1.411030119,0.,1.665510547<br/> Be,-3.8955090707,0.,2.5121533429<br/> H,-5.0055009498,0.,1.7158425002<br/> H,-3.493976852,0.,3.80551603</p>     |
|  | <p><b>1:BeF<sub>2</sub>(OH)</b><br/> MP2= -481.07105491 NIMAG= 0<br/> C,-0.2344786146,0.,0.0725982921<br/> O,-0.1231335874,0.,1.3111971166<br/> H,0.6736428066,0.,-0.5387917611<br/> C,-1.5161507187,0.,-0.5906946681<br/> H,-1.5832708191,0.,-1.6662353524<br/> C,-2.643863915,0.,0.1549271674<br/> H,-3.6579435217,0.,-0.2195012247<br/> O,-2.5729928551,0.,1.501720719<br/> H,-1.5736055458,0.,1.7462827031<br/> Be,-3.9456611441,0.,2.5183135245<br/> F,-5.09574575,0.,1.6637306432<br/> F,-3.5646659553,0.,3.8866861005</p> |

|                                                                                    |                                                                                                                                                                                                                                                                                                                                                                                                                                                                                                                                      |
|------------------------------------------------------------------------------------|--------------------------------------------------------------------------------------------------------------------------------------------------------------------------------------------------------------------------------------------------------------------------------------------------------------------------------------------------------------------------------------------------------------------------------------------------------------------------------------------------------------------------------------|
| 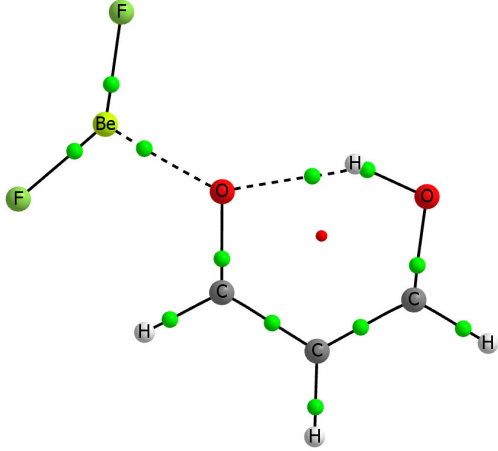  | <p><b>1:BeF<sub>2</sub>(CO)</b><br/> MP2= -481.07825942 NIMAG= 0<br/> C,-2.3917206387,0.,0.0197017568<br/> O,-2.6230795281,0.,1.3074790105<br/> H,-3.2962101613,0.,-0.5766491269<br/> C,-1.146282032,0.,-0.5579458078<br/> H,-1.0599004972,0.,-1.6316454851<br/> C,0.0121907262,0.,0.2423663568<br/> H,1.0065345374,0.,-0.2049221056<br/> O,-0.058444529,0.,1.5091477413<br/> H,-1.7427937868,0.,1.7655145367<br/> Be,1.3660563565,0.,2.4340353569<br/> F,2.5046530408,0.,1.5541971788<br/> F,1.0909018225,0.,3.8313520377</p>       |
|  | <p><b>1:BeF<sub>2</sub>(ts)</b><br/> MP2= -481.07030865 NIMAG= 1<br/> C,-0.2593215076,0.,0.0687207484<br/> O,-0.1800476272,0.,1.3266141514<br/> H,0.6739579374,0.,-0.4956536942<br/> C,-1.5115684478,0.,-0.6058663031<br/> H,-1.5702595409,0.,-1.6808934405<br/> C,-2.6406988778,0.,0.1608476475<br/> H,-3.6569712897,0.,-0.2142067287<br/> O,-2.5324203971,0.,1.4827776396<br/> H,-1.4078406287,0.,1.6708382822<br/> Be,-3.8923955935,0.,2.5040665587<br/> F,-5.0621495977,0.,1.6715643802<br/> F,-3.5170543292,0.,3.8755479187</p> |

Fig. S1. Relationship between electron densities at the O-H hydrogen bonds and interatomic distances.

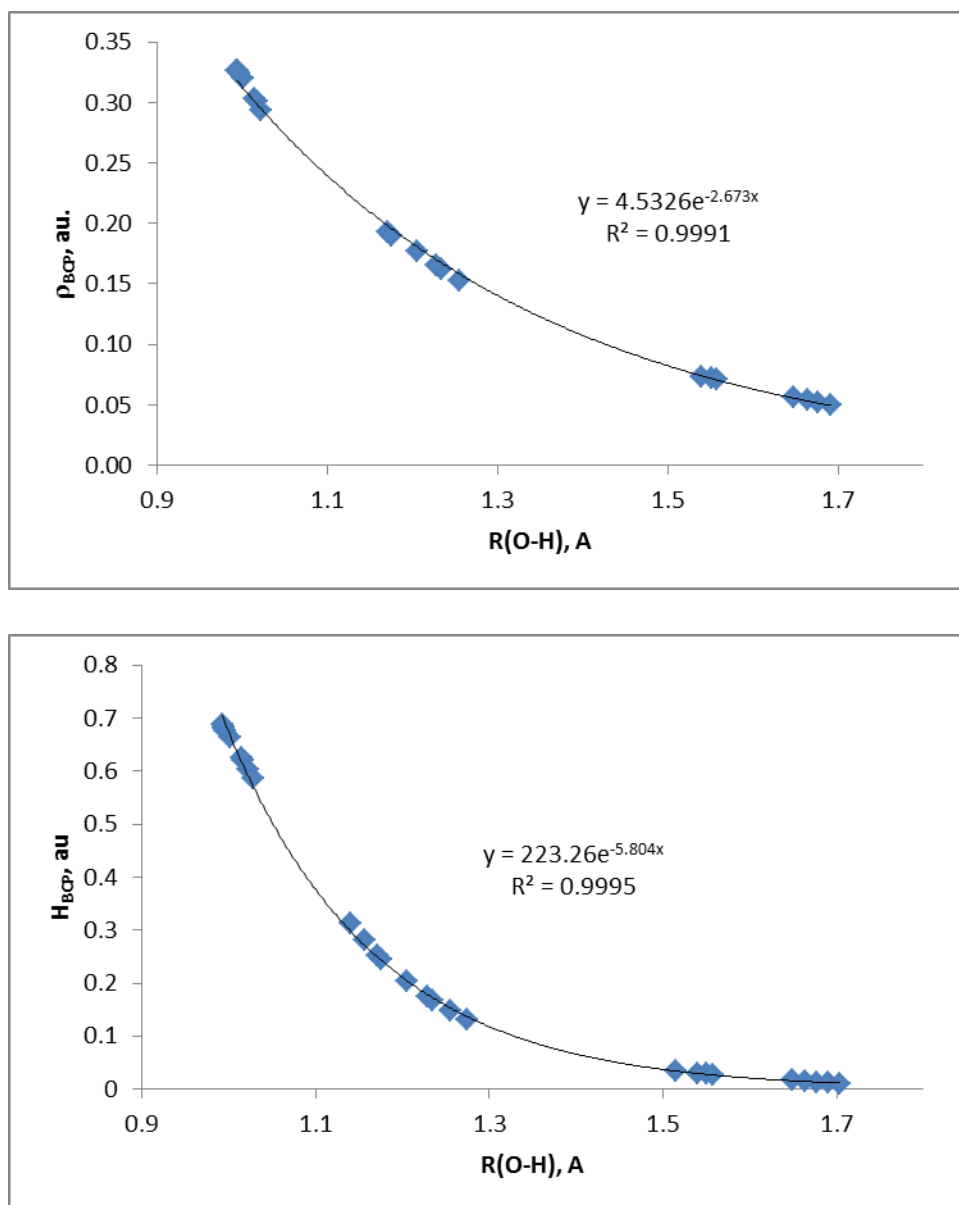

Table S2. Components of spin-spin coupling constants  $^2J(\text{O-O})$ ,  $^1J(\text{H-O})$ , and  $^1J(\text{O-H})$  (Hz)

| Monomer/Complex                   | PSO | DSO | FC   | SD  | $^2J(\text{O-O})$ |
|-----------------------------------|-----|-----|------|-----|-------------------|
| <b>1</b>                          | 5.0 | 0.0 | 4.3  | 2.2 | 11.5              |
| ts                                | 8.2 | 0.0 | 13.2 | 3.3 | 24.7              |
| <b>1:LiH at C=O</b>               | 4.1 | 0.0 | 4.2  | 1.9 | 10.2              |
| O-H                               | 4.5 | 0.0 | 7.3  | 1.9 | 13.7              |
| ts                                | 6.6 | 0.0 | 14.6 | 2.7 | 24.0              |
| <b>1:LiF at C=O</b>               | 4.1 | 0.0 | 4.5  | 1.8 | 10.5              |
| O-H                               | 4.4 | 0.0 | 7.2  | 1.9 | 13.5              |
| ts                                | 6.6 | 0.0 | 14.8 | 2.6 | 24.1              |
| <b>1:BeH<sub>2</sub> at C=O</b>   | 3.8 | 0.0 | 4.4  | 1.7 | 10.0              |
| O-H                               | 4.1 | 0.0 | 8.5  | 1.7 | 14.3              |
| ts                                | 5.8 | 0.0 | 15.6 | 2.3 | 23.8              |
| <b>1:BeF<sub>2</sub> - at C=O</b> | 3.6 | 0.0 | 4.2  | 1.7 | 9.6               |
| O-H                               | 4.1 | 0.0 | 9.5  | 1.7 | 15.4              |
| ts                                | 5.6 | 0.0 | 15.8 | 2.3 | 23.6              |



| Monomer/Complex                 | PSO  | DSO  | FC    | SD   | $^1J(\text{O-H})$ |
|---------------------------------|------|------|-------|------|-------------------|
| <b>1</b>                        | -4.8 | -0.5 | -72.4 | -0.1 | -77.7             |
| ts                              | 1.3  | -0.7 | -20.0 | -0.2 | -19.6             |
| <b>1:LiH at C=O</b>             | -5.0 | -0.4 | -73.6 | -0.1 | -79.2             |
| O-H                             | -3.6 | -0.5 | -77.0 | 0.0  | -81.3             |
| ts                              | 0.8  | -0.7 | -31.1 | -0.1 | -31.2             |
| <b>1:LiF at C=O</b>             | -4.9 | -0.5 | -73.1 | -0.1 | -78.6             |
| O-H                             | -3.7 | -0.5 | -77.9 | 0.0  | -82.2             |
| ts                              | 0.9  | -0.7 | -30.0 | -0.1 | -30.0             |
| <b>1:BeH<sub>2</sub> at C=O</b> | -4.8 | -0.4 | -75.9 | -0.2 | -81.4             |
| O-H                             | -3.0 | -0.6 | -86.1 | 0.0  | -89.7             |
| ts                              | 0.5  | -0.8 | -41.1 | -0.1 | -41.4             |
| <b>1:BeF<sub>2</sub> at C=O</b> | -4.9 | -0.5 | -76.5 | -0.2 | -82.1             |
| O-H                             | -2.7 | -0.7 | -85.3 | 0.0  | -88.7             |
| ts                              | 0.3  | -0.8 | -46.5 | 0.0  | -47.1             |

| Monomer/Complex | PSO | DSO  | FC    | SD   | $^1J(\text{H-O})$ |
|-----------------|-----|------|-------|------|-------------------|
| <b>1</b>        | 2.2 | -0.7 | 6.6   | -0.2 | 7.9               |
| ts              | 1.3 | -0.7 | -20.0 | -0.2 | -19.7             |
| <b>1</b> at O   | 2.0 | -0.7 | 6.8   | -0.2 | 7.9               |
| at OH           | 2.3 | -0.7 | 6.2   | -0.4 | 7.4               |
| ts              | 1.6 | -0.7 | -15.0 | -0.3 | -14.5             |
| <b>1</b> at O   | 2.0 | -0.7 | 6.9   | -0.2 | 8.1               |
| at OH           | 2.3 | -0.7 | 6.2   | -0.4 | 7.4               |
| ts              | 1.5 | -0.7 | -16.0 | -0.3 | -15.5             |
| <b>1</b> at O   | 1.8 | -0.7 | 6.8   | -0.2 | 7.8               |
| at OH           | 2.2 | -0.7 | 5.3   | -0.4 | 6.4               |
| ts              | 1.7 | -0.7 | -13.3 | -0.4 | -12.8             |
| <b>1</b> at O   | 1.8 | -0.8 | 6.8   | -0.1 | 7.7               |
| at OH           | 2.3 | -0.8 | 4.7   | -0.5 | 5.8               |
| ts              | 1.9 | -0.8 | -10.9 | -0.4 | -10.3             |
